# Supplementary material for: Structural elements of a pH-sensitive inhibitor binding site in NMDA receptors
Source: PubMed Central journal article supplement (PMC6338780; doi:10.1038/s41467-019-08291-1), 2019-01-18
Supplement: 41467_2019_8291_MOESM1_ESM.pdf [file 41467_2019_8291_MOESM1_ESM.pdf]

## **Supplementary Information**

### **Structural Elements of a pH-Sensitive Inhibitor Binding Site in NMDA Receptors.**

Michael C. Regan<sup>1</sup>, Zongjian Zhu<sup>2,3</sup>, Hongjie Yuan<sup>2</sup>, Scott J. Myers<sup>2</sup>, Dave S. Menaldino<sup>4</sup>,  
Yesim A. Tahirovic<sup>4</sup>, Dennis C Liotta<sup>4</sup>, Stephen F. Traynelis<sup>2</sup>, and Hiro Furukawa<sup>1</sup>.

This file contains:

Supplementary Figures 1 to 8

Supplementary Table 1 to 2

**a**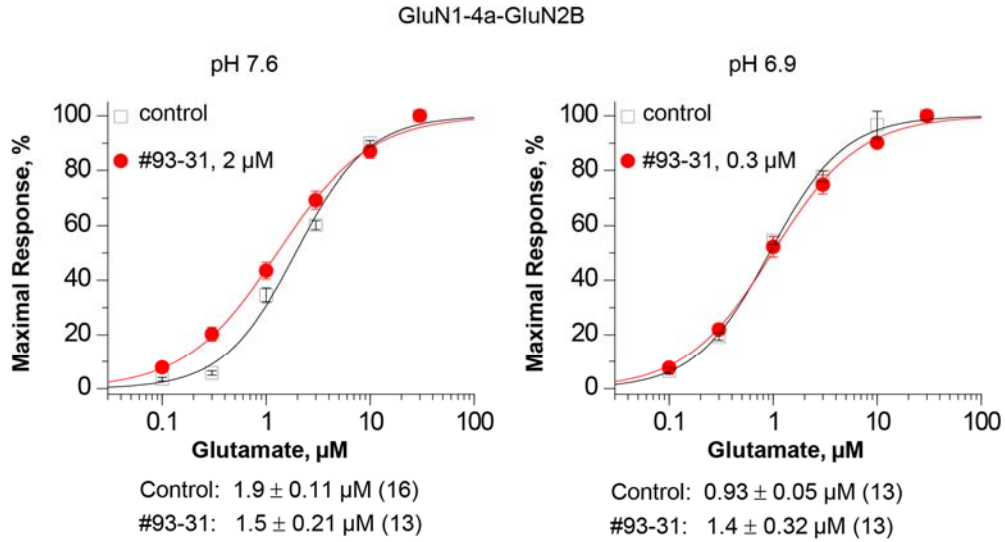**b**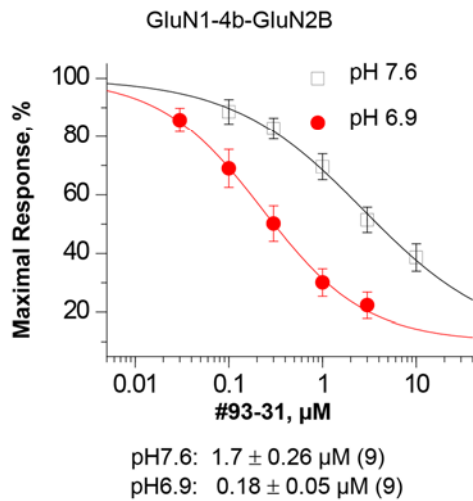

**Supplemental Figure 1 | Binding properties of 93-31.** **a**, Glutamate dose-response curves (in the presence of 100  $\mu\text{M}$  glycine) from TEVC experiments in the presence (red filled circles) or absence (empty squares) of 2  $\mu\text{M}$  of 93-31 at pH 7.6 (*left panel*) and 0.3  $\mu\text{M}$  at 6.9 (*right panel*) for activation of wild type GluN1-4a/GluN2B NMDA receptor. **b**, Concentration-response curves for inhibition of wild type GluN1-4b/GluN2B NMDA receptor by 93-31 at pH 7.6 (empty squares) and at pH 6.9 (red circles) (Please also see **Table 2**). The fitted minimums were set as 10%. Symbols and error bars represent mean  $\pm$  S.E.M.

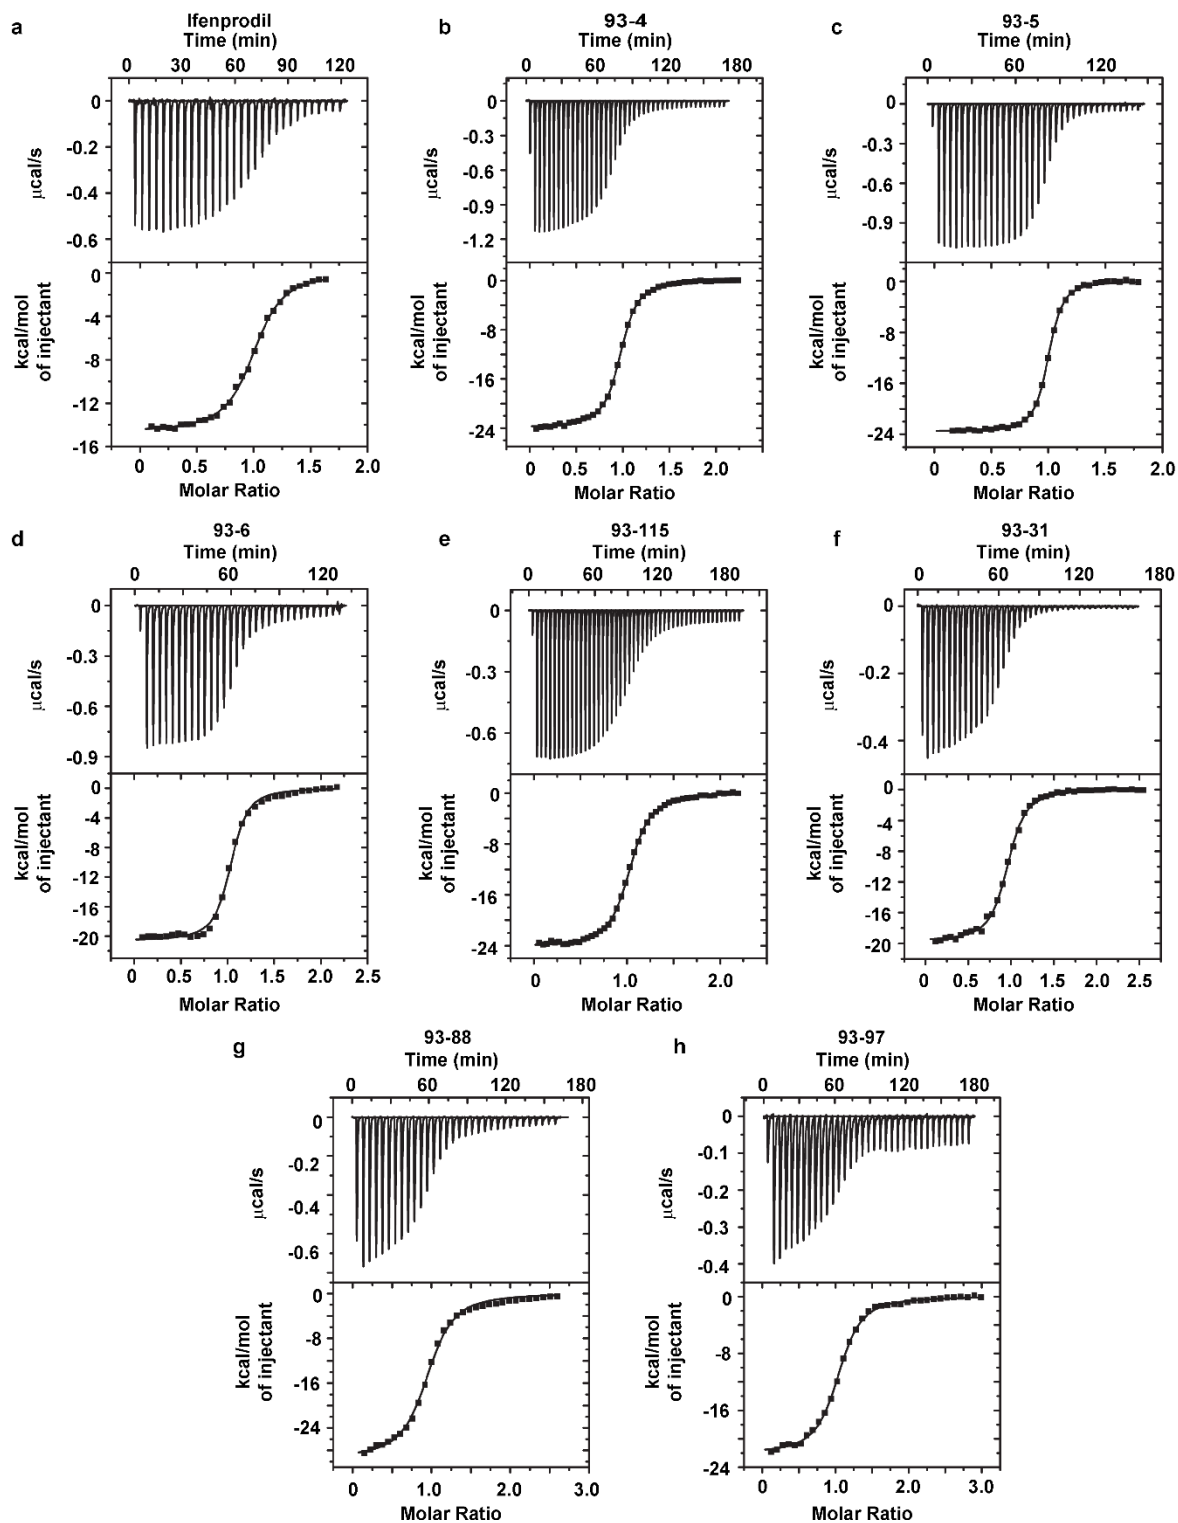

**Supplemental Figure 2 | Representative ITC isotherms at pH 7.6.** a-h The isolated GluN1a-GluN2B ATD was titrated with ligands as described in **Methods**; the results of triplicate experiments are listed in **Table 1**.

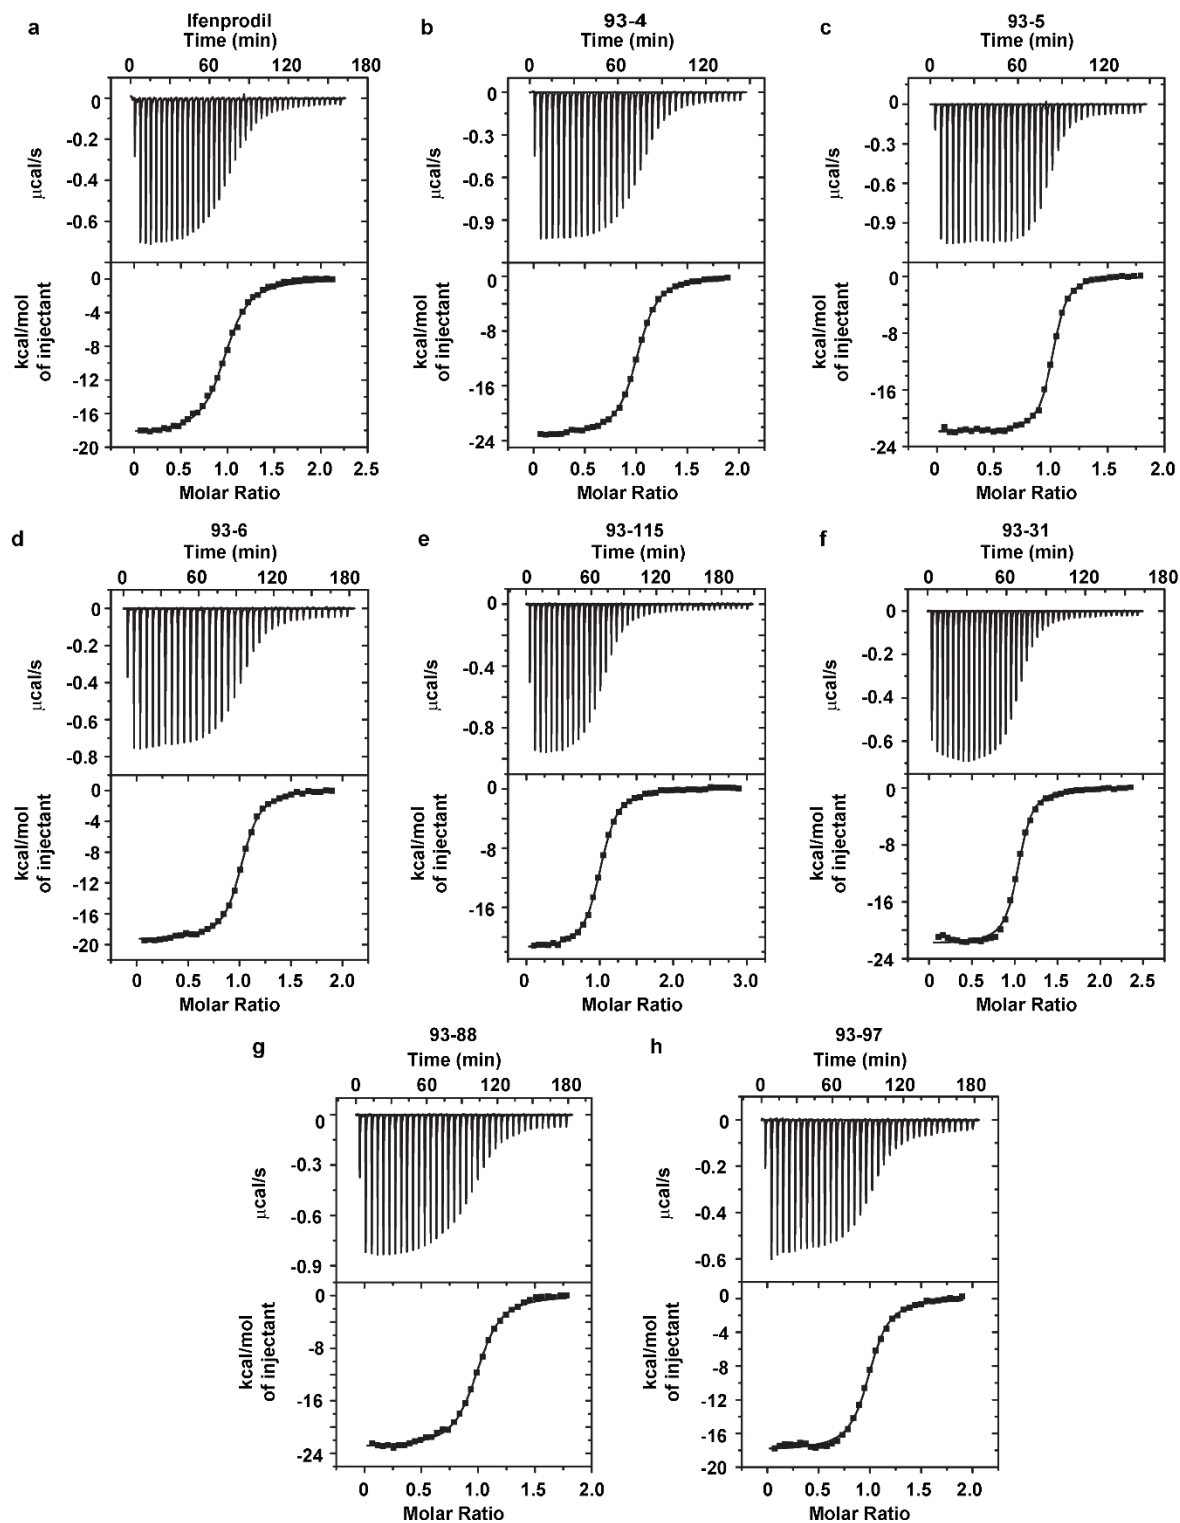

**Supplemental Figure 3 | Representative ITC isotherms at pH 6.5.** a-h The isolated GluN1a-GluN2B ATD was titrated with the given ligands as described in **Methods**; the results of triplicate experiments are listed in **Table 1**.

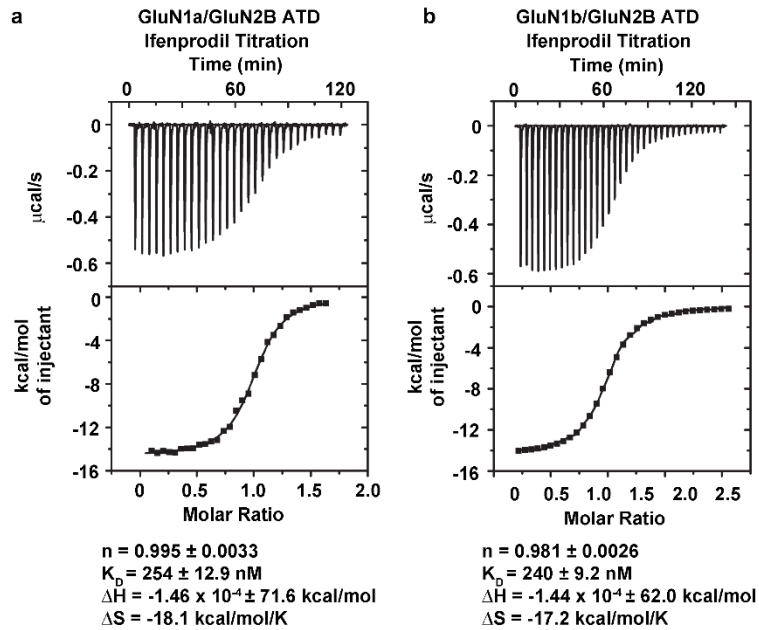

**Supplemental Figure 4 | Comparison of ligand binding between the GluN1a-GluN2B ATD from HEK cells and GluN1b-GluN2B ATD from High5 cells.** Despite extensive efforts, we were unable to obtain crystals of the GluN1a-GluN2B ATD expressed in HEK cells; however, initial experiments demonstrated no substantial differences in the ATD/ifenprodil binding interaction between the GluN1a-GluN2B ATD expressed in HEK cells (**a**) and the GluN1b-GluN2B ATD expressed in High 5 cells that we used for crystallization studies (**b**).

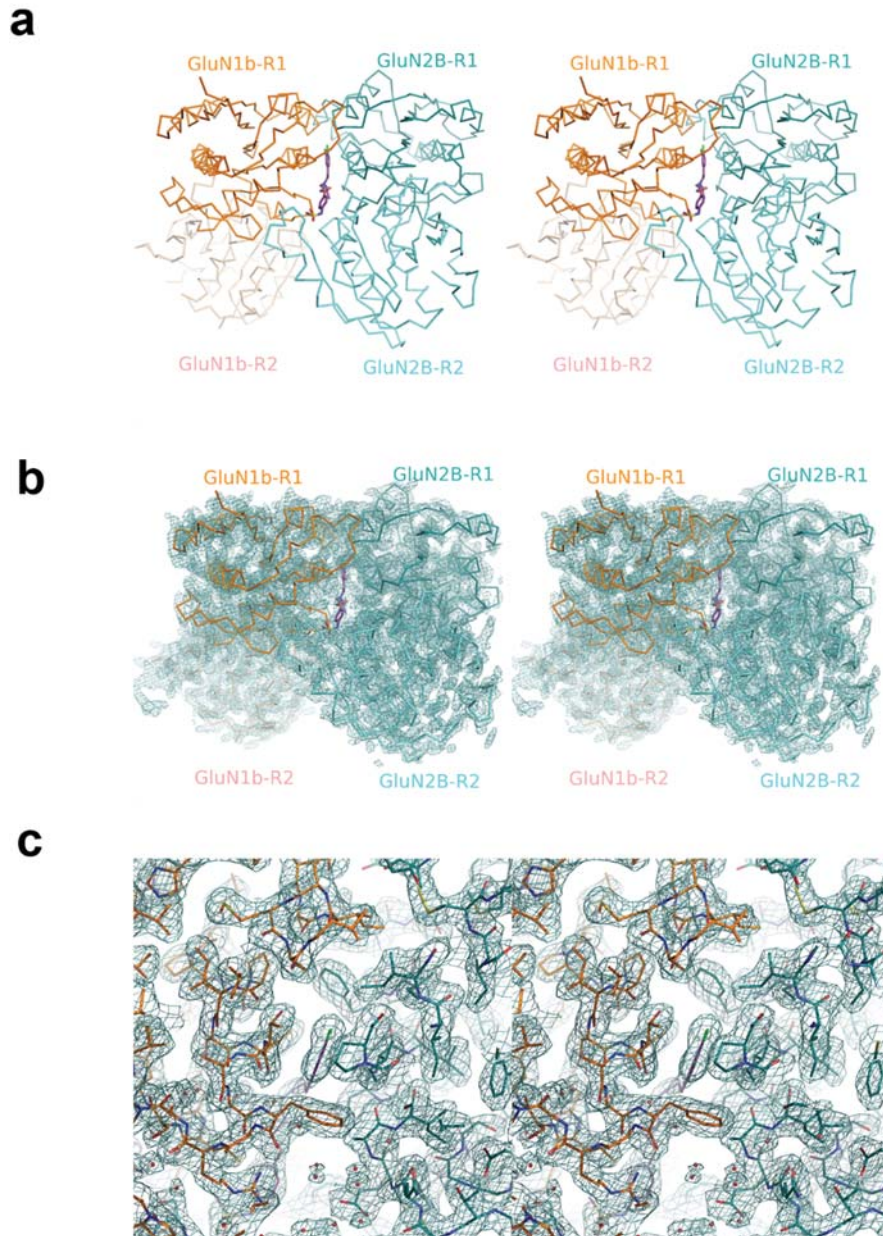

**Supplemental Figure 5 | Crystal structure of GluN1b-GluN2B ATD complexed to 93-31. (a)** Stereoview of the GluN1b-GluN2B ATD structural model. The purple stick at the GluN1b-GluN2B ATDs represents 93-31. **(b)** The *2Fo-Fc* electron density map (mesh) countered at  $1.5\sigma$  in the same orientation in *panel a*. **(c)** The *2Fo-Fc* electron density map (mesh) countered at  $1.5\sigma$  at the GluN1b-GluN2B heterodimer interface looking down from the ‘top’ of the binding site of 93-31 (purple stick) showing fine structural details such as oxygen atoms from waters (red spheres). Color codes for the structural models are as in Fig. 3.

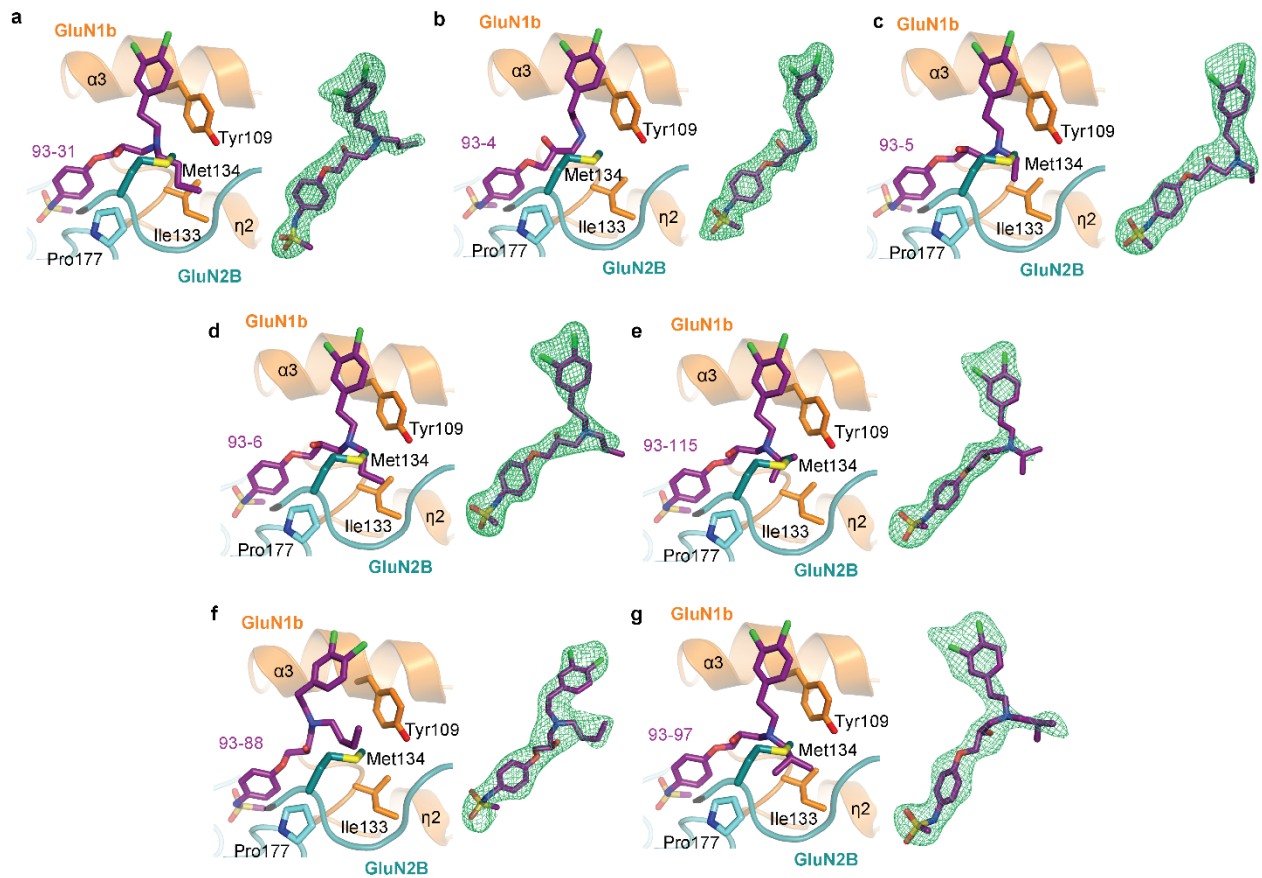

**Supplemental Figure 6 | Binding poses and electron densities for 93-series ligands. a-g.** The 93-series negative allosteric modulators (purple sticks) bind at the GluN1-GluN2B ATD dimer interface in a similar fashion, with the exception of 93-88 (**f**), which, as the (*R*) enantiomer, adopts a rather different orientation. Electron densities (green mesh) were generated from the  $F_o-F_c$  omit map, contoured at  $3\sigma$ . For clarity, water molecules at the binding site have been omitted.



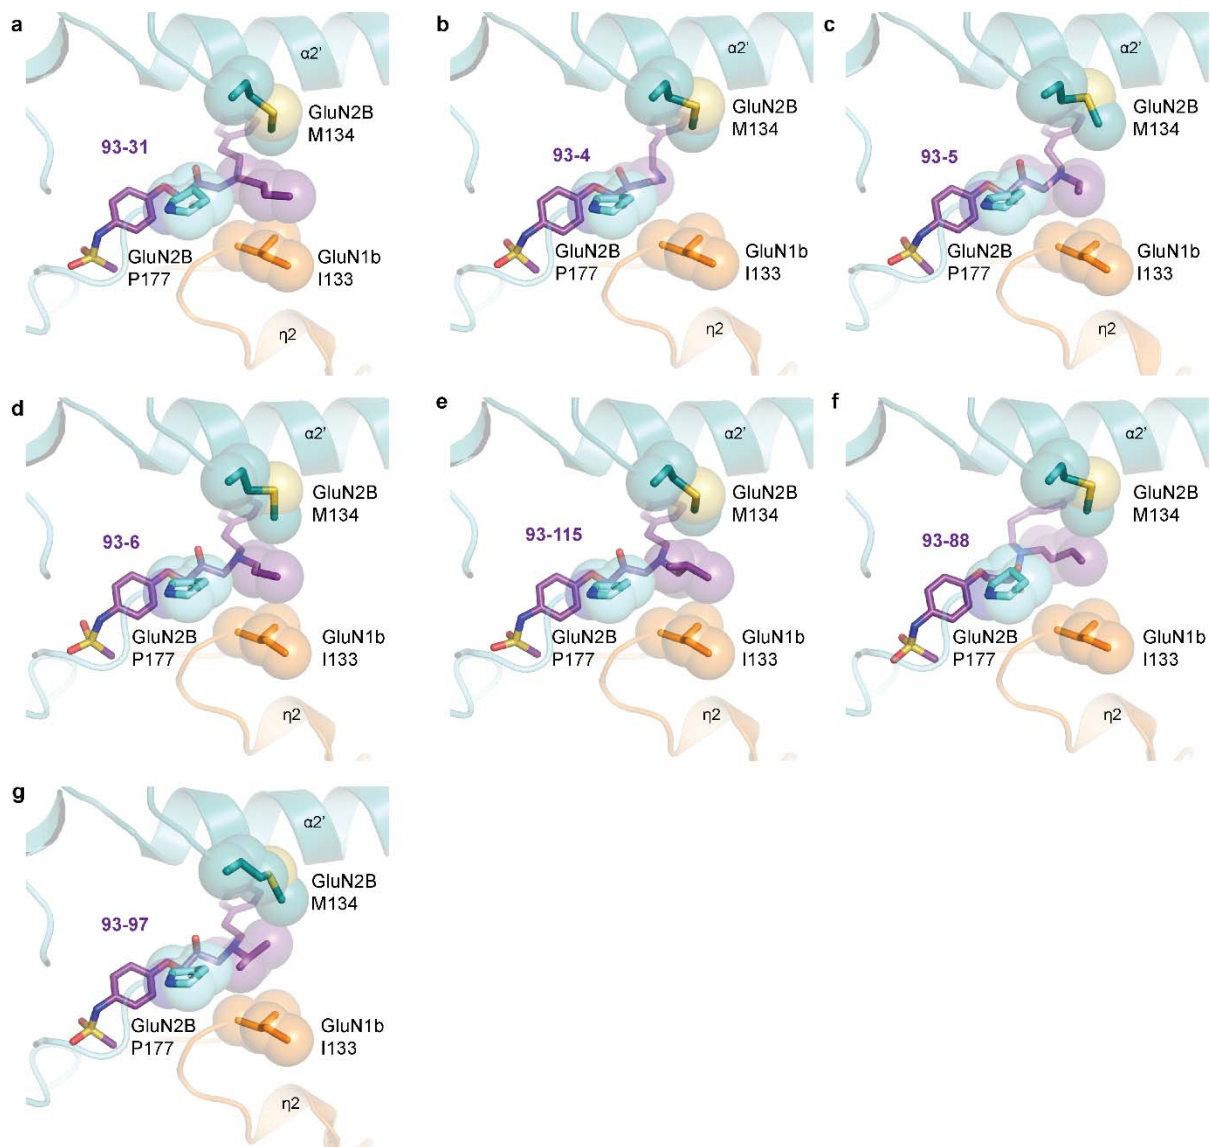

**Supplemental Figure 7 | Hydrophobic interactions of the 93-series ligands. a-g.** The N-alkyl substitution present in 93-series compounds forms hydrophobic interactions with GluN1b(Ile133), GluN2B(Met134), and GluN2B(Pro177).



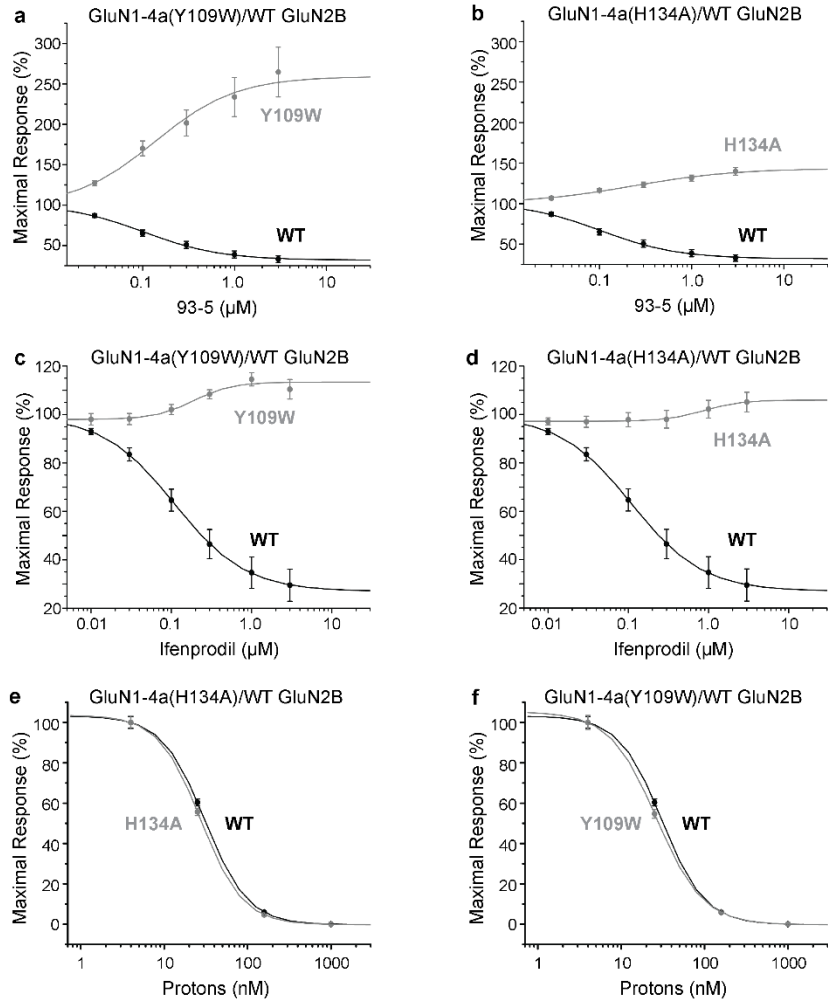

**Supplemental Figure 8 | GluN1 potentiating mutants.** a-d. TEVC recordings with the GluN1-4a(His134Ala) and GluN1-4a(Tyr109Trp) mutants co-expressed with wild type GluN2B at pH 7.6. Both mutants convert 93-5 to a potentiator of the NMDA receptor, and completely eliminate the inhibitory effect of ifenprodil. e-f. Neither mutant has an effect on NMDA receptor proton sensitivity. Error bars represent mean  $\pm$  S.E.M.

**Supplementary Table 1 | Data collection and refinement statistics.**

|                                      | <b>ATD + 93-4</b>        | <b>ATD + 93-5</b>        | <b>ATD + 93-6</b>        | <b>ATD + 93-115</b>      | <b>ATD + 93-31</b>       | <b>ATD + 93-88</b>       | <b>ATD + 93-97</b>       |
|--------------------------------------|--------------------------|--------------------------|--------------------------|--------------------------|--------------------------|--------------------------|--------------------------|
| <b>Data collection</b>               |                          |                          |                          |                          |                          |                          |                          |
| Space group                          | C2                       | C2                       | C2                       | C2                       | C2                       | C2                       | C2                       |
| Unit cell dimensions<br>a, b, c (Å)  | 267.95, 59.90,<br>145.29 | 268.43, 60.63,<br>145.39 | 268.59, 59.84,<br>146.02 | 268.13, 59.59,<br>145.50 | 268.62, 59.60,<br>145.91 | 268.13, 59.61,<br>145.53 | 268.42, 59.54,<br>146.11 |
| $\alpha, \beta, \gamma$ (°)          | 90, 116.69, 90           | 90, 116.42, 90           | 90, 116.86, 90           | 90, 116.62, 90           | 90, 117.10, 90           | 90, 116.86, 90           | 90, 116.69, 90           |
| Resolution (Å)                       | 35.00-2.10<br>(2.14)     | 29.88-2.72<br>(2.79)     | 50.00-2.31<br>(2.35)     | 35.00-2.67<br>(2.72)     | 35.00-2.27<br>(2.32)     | 35.00-2.60<br>(2.64)     | 35.00-2.58<br>(2.62)     |
| R <sub>merge</sub>                   | 4.8 (104)                | 6.5 (95.8)               | 9.2 (60.6)               | 8.3 (76.6)               | 6.8 (109)                | 9.1 (65.9)               | 11.4 (86.0)              |
| I/ $\sigma$ I                        | 24.9 (1.0)               | 14.4 (1.4)               | 13.6 (1.3)               | 11.5 (1.04)              | 15.6 (1.0)               | 8.3 (1.0)                | 10.6 (1.14)              |
| Completeness (%)                     | 98.8 (96.8)              | 98.6 (93.9)              | 91.0 (48.1)              | 89.7 (89.8)              | 98.6 (97.3)              | 88.6 (63.8)              | 96.2 (89.9)              |
| Redundancy                           | 4.0 (3.2)                | 3.5 (3.2)                | 3.6 (1.9)                | 2.3 (2.0)                | 3.4 (3.0)                | 2.0 (1.6)                | 4.4 (4.0)                |
| <b>Refinement</b>                    |                          |                          |                          |                          |                          |                          |                          |
| Resolution (Å)                       | 25.00-2.10               | 25.00-2.72               | 25.00-2.31               | 25.00-2.66               | 25.00-2.27               | 25.00-2.60               | 25.00-2.58               |
| No. reflections                      | 95,244                   | 53,230                   | 67,430                   | 44,140                   | 74,940                   | 44,677                   | 53,795                   |
| R <sub>work</sub> /R <sub>free</sub> | 0.19/0.22                | 0.19/0.23                | 0.19/0.23                | 0.19/0.23                | 0.20/0.23                | 0.19/0.23                | 0.19/0.22                |
| No. atoms                            |                          |                          |                          |                          |                          |                          |                          |
| Protein                              | 11,118                   | 11,149                   | 10,860                   | 11,027                   | 11,129                   | 11,063                   | 11,123                   |
| 93-series Ligand                     | 54                       | 58                       | 60                       | 60                       | 62                       | 62                       | 62                       |
| Na                                   | 2                        | 2                        | 2                        | 2                        | 2                        | 2                        | 2                        |
| Cl                                   | 12                       | 8                        | 11                       | 11                       | 12                       | 11                       | 9                        |
| Water                                | 339                      | 178                      | 317                      | 232                      | 333                      | 243                      | 241                      |
| B-factors (Å <sup>2</sup> )          |                          |                          |                          |                          |                          |                          |                          |
| Protein                              | 40.61                    | 78.30                    | 44.81                    | 52.62                    | 41.85                    | 54.68                    | 51.69                    |
| 93-series Ligand                     | 38.02                    | 58.83                    | 31.36                    | 43.98                    | 39.81                    | 64.90                    | 51.67                    |
| Na                                   | 21.98                    | 54.65                    | 29.31                    | 33.46                    | 24.08                    | 33.79                    | 35.60                    |
| Cl                                   | 60.48                    | 94.19                    | 59.94                    | 69.89                    | 61.05                    | 70.62                    | 67.18                    |
| Water                                | 32.12                    | 56.59                    | 33.98                    | 37.42                    | 33.84                    | 39.45                    | 37.81                    |
| R.M.S. deviations                    |                          |                          |                          |                          |                          |                          |                          |
| Bond lengths (Å)                     | 0.006                    | 0.002                    | 0.001                    | 0.001                    | 0.004                    | 0.001                    | 0.001                    |
| Bond angles (°)                      | 0.372                    | 0.380                    | 0.363                    | 0.362                    | 0.800                    | 0.346                    | 0.389                    |

All datasets were collected from a single crystal. Values in parentheses are for the highest-resolution shell.

**Supplemental Table 2 | Mutagenesis primers used in this study for TEVC experiments**

| <b>Mutation</b>  | <b>Forward Primer Sequence</b>           | <b>Reverse Primer Sequence</b>           |
|------------------|------------------------------------------|------------------------------------------|
| GluN1-4a (S108A) | CACTCCCACCCCTGTGCGCTACACAGCTGGCTTC       | GAAGCCAGCTGTGTAGGCCGACAGGGGTGGGAGTG      |
| GluN1-4a (Y109A) | CCCACCCCTGTCTCCGCCACAGCTGGCTTCTAC        | GTAGAAGCCAGCTGTGGCGGAGACAGGGGTGGG        |
| GluN1-4a (Y109W) | CCCACCCCTGTCTCCTGGACAGCTGGCTTCTAC        | GTAGAAGCCAGCTGTCCAGGAGACAGGGGTGGG        |
| GluN1-4a (I133A) | CTACTCTGACAAGAGTGCCACCTGAGTTTCCTTCG      | CGAAGGAAACTCAGGTGGGCACTCTTGTCAGAGTAG     |
| GluN1-4a (H134A) | CTACTCTGACAAGAGTATCGCCCTGAGTTTCCTTCGCACG | CGTGCGAAGGAAACTCAGGGCGATACTCTTGTCAGAGTAG |
| GluN2B(M134A)    | GGCTCATCTATGATAGCGGCGGATAAGGATGAG        | CTCATCCTTATCCGCCGCTATCATAGATGAGCC        |
| GluN2B(D136A)    | CATCTATGATAATGGCGGCTAAGGATGAGTCCTCCATG   | CATGGAGGACTCATCCTTAGCCGCCATTATCATAGATG   |
| GluN2B(P177A)    | CGTCACCACCTACTTCGCTGGCTACCAGGAC          | GTCCTGGTAGCCAGCGAAGTAGGTGGTGACG          |
| GluN2B(P177G)    | CGTCACCACCTACTTCGGTGGCTACCAGGAC          | GTCCTGGTAGCCACCGAAGTAGGTGGTGACG          |
| GluN2B(E236A)    | CCTTTATTGCACGAAGGAGGCAGCCACCTACATTTTTG   | CAAAAATGTAGGTGGCTGCCTCCTTCGTGCAATAAAGG   |
| GluN2B(E236Q)    | CCTTTATTGCACGAAGGAGCAAGCCACCTACATTTTTG   | CAAAAATGTAGGTGGCTTGCTCCTTCGTGCAATAAAGG   |
